# Supplementary material
Source: PubMed Central journal article supplement (PMC1150841)
Supplement: pnas_0503112102_3.pdf [file pnas_0503112102_3.pdf]

**Table 4. Oligonucleotides used to construct the SfiI and NotI sites**

| <b>Oligo name</b> | <b>Primer sequence</b>                                                   | <b><i>T<sub>m</sub></i></b> |
|-------------------|--------------------------------------------------------------------------|-----------------------------|
| SCD-SfiI-f        | AAAAAAAAAAAAA <u>GGCCCAGCCG</u> CCATGGAGGCCAACGCCAAGAAG<br><b>SfiI</b>   | 75.6°C<br>46-mer            |
| SCD-BspeI-r       | AAAAAAAAAAA <u>TCCGGA</u> GCCGGTGCCGGAGGTCAGCAGCCACTG<br><b>BspeI</b>    | 73°C<br>43-mer              |
| SCD-BspeI-f       | AAAAAAAAAAA <u>TCCGGA</u> ACCGCCCTCGGTTGGACGGTGGCCTGGAAG<br><b>BspeI</b> | 77°C<br>46-mer              |
| SCD- NotI-r       | AAAAAAAAAA <u>GCGGCCG</u> CGCCGTCGGTGGCCGGGGCGCTGTCGTAAC<br><b>NotI</b>  | 80.9°C<br>46-mer            |

**f and r refer to forward and reverse primers, respectively.**
