# Supplementary material
Source: PubMed Central journal article supplement (PMC1150841)
Supplement: pnas_0503112102_5.pdf [file pnas_0503112102_5.pdf]

**Table 5. Primer sequences used for error-prone PCR**

| <b>Primer name</b>             | <b>Primer sequence</b>                                 | <b><math>T_m</math></b> |
|--------------------------------|--------------------------------------------------------|-------------------------|
| EPP+<br>pCANTAB 5E-<br>Forward | 5' - GTTGTCCTTTCTATGCGGCCAGCCGGCC - 3'<br><b>SfiI</b>  | 71.6°C<br>30-mer        |
| EPP+<br>pCANTAB 5E-<br>Reverse | 5' - GGATACGGCACCGGCGCACCTGCGGCCGC - 3'<br><b>NotI</b> | 78.2°C<br>29-mer        |
