# Supplementary material
Source: PubMed Central journal article supplement (PMC1150841)

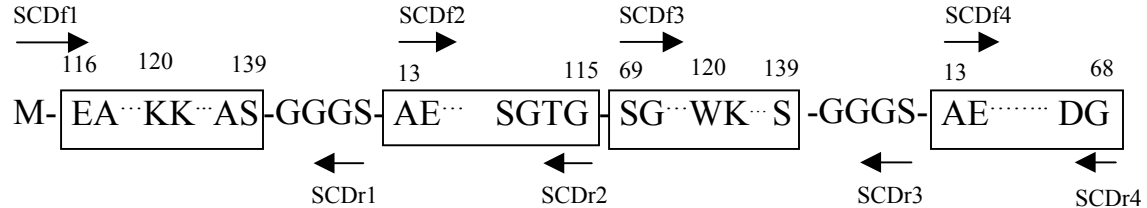

Supplement: pnas_0503112102_1.pdf [file pnas_0503112102_1.pdf]

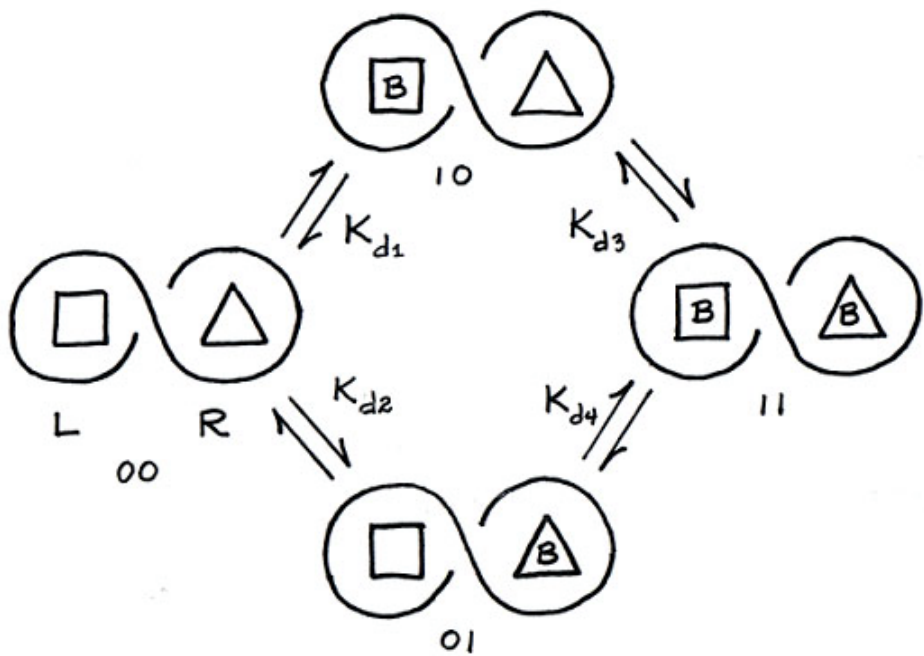

Supplement: pnas_0503112102_10.pdf [file pnas_0503112102_10.pdf]

DIMERS

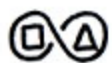

+

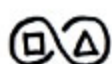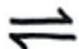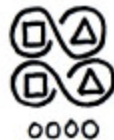

0000

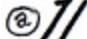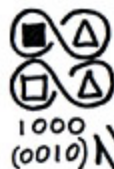

1000  
(0010)

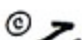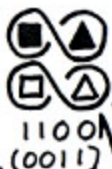

1100  
(0011)

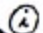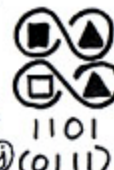

1101  
(0111)

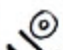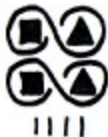

1111

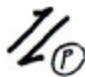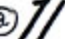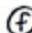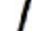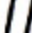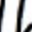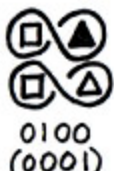

0100  
(0001)

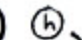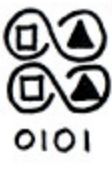

0101

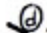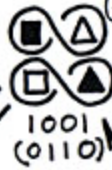

1001  
(0110)

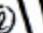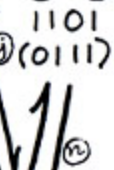

1010

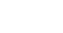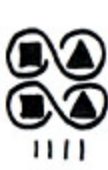

1011  
(1110)

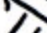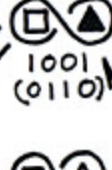

1101  
(0111)

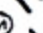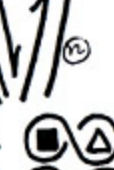

1110

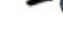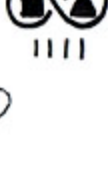

1111

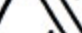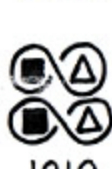

1010

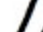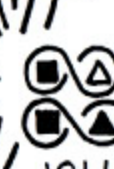

1011  
(1110)

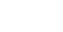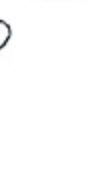

1110

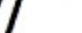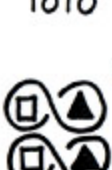

1101  
(0111)

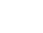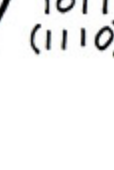

1101  
(0111)

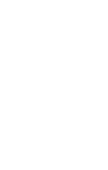

1101  
(0111)

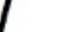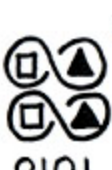

1101  
(0111)

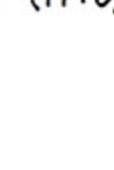

1101  
(0111)

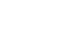

1101  
(0111)

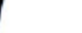

1101  
(0111)

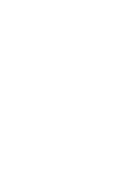

1101  
(0111)

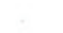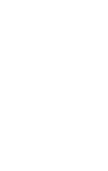

1101  
(0111)

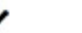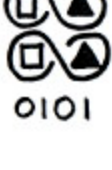

1101  
(0111)

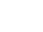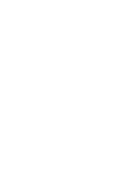

1101  
(0111)

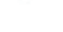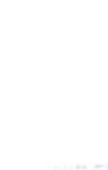

1101  
(0111)

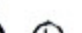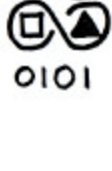

1101  
(0111)



1101  
(0111)

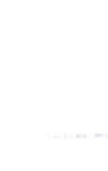

1101  
(0111)

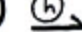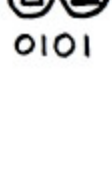

1101  
(0111)



1101  
(0111)

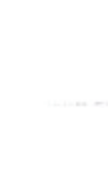

1101  
(0111)

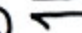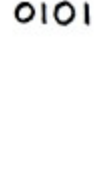

1101  
(0111)



1101  
(0111)

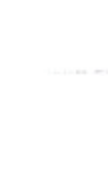

1101  
(0111)

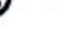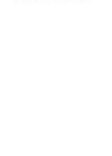

1101  
(0111)

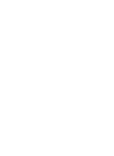

1101  
(0111)

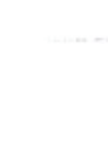

1101  
(0111)

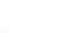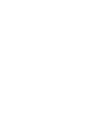

1101  
(0111)

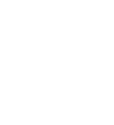

1101  
(0111)

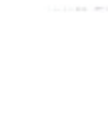

1101  
(0111)

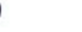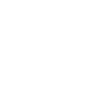

1101  
(0111)

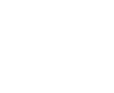

1101  
(0111)

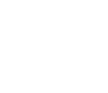

1101  
(0111)

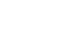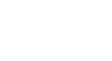

1101  
(0111)

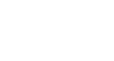

1101  
(0111)

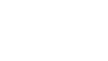

1101  
(0111)

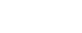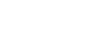

1101  
(0111)

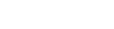

1101  
(0111)

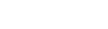

1101  
(0111)



1101  
(0111)



1101  
(0111)



1101  
(0111)



1101  
(0111)



1101  
(0111)



1101  
(0111)

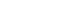

1101  
(0111)



1101  
(0111)



1101  
(0111)



1101  
(0111)



1101  
(0111)



1101  
(0111)



1101  
(0111)



1101  
(0111)



1101  
(0111)



1101  
(0111)



1101  
(0111)



1101  
(0111)



1101  
(0111)



1101  
(0111)



1101  
(0111)



1101  
(0111)



1101  
(0111)



1101  
(0111)



1101  
(0111)



1101  
(0111)



1101  
(0111)



1101  
(0111)



1101  
(0111)



1101  
(0111)



1101  
(0111)



1101  
(0111)



1101  
(0111)

Supplement: pnas_0503112102_11.pdf [file pnas_0503112102_11.pdf]

% intensity

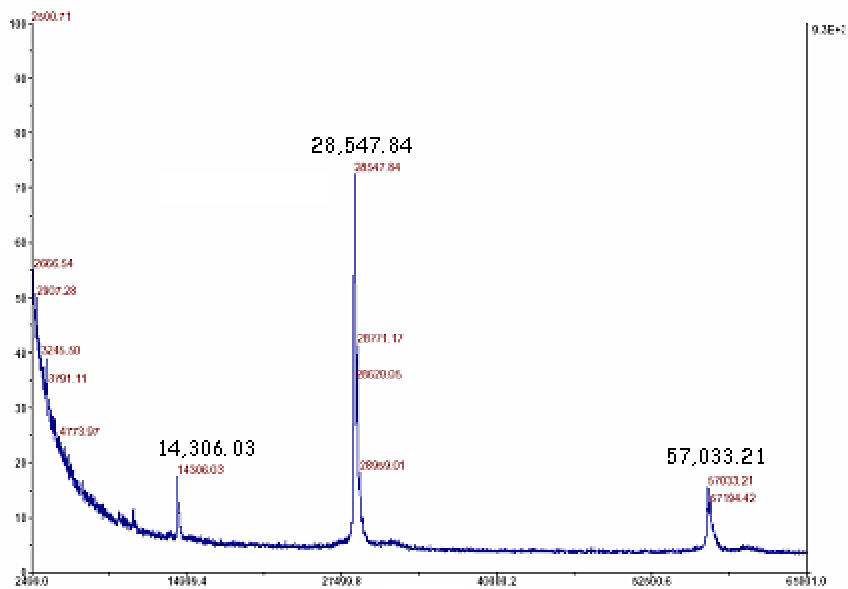

Mass (m/z)

Supplement: pnas_0503112102_6.pdf [file pnas_0503112102_6.pdf]

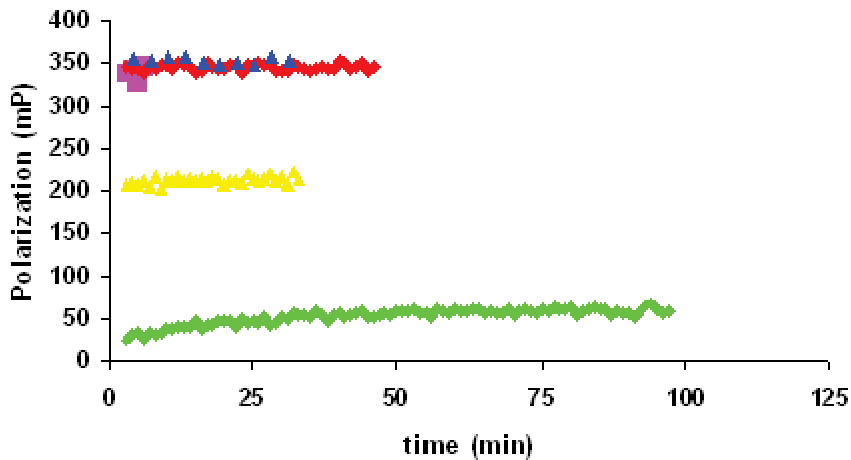

Supplement: pnas_0503112102_7.pdf [file pnas_0503112102_7.pdf]

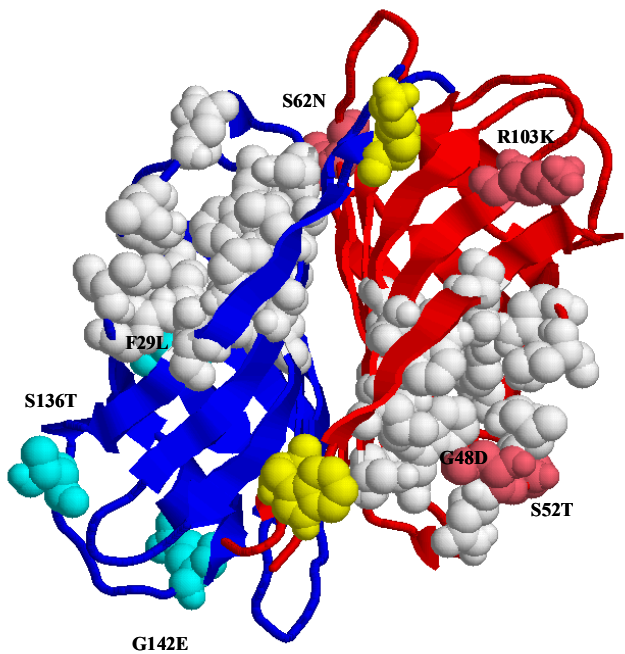

Supplement: pnas_0503112102_8.pdf [file pnas_0503112102_8.pdf]

TETRAMER A

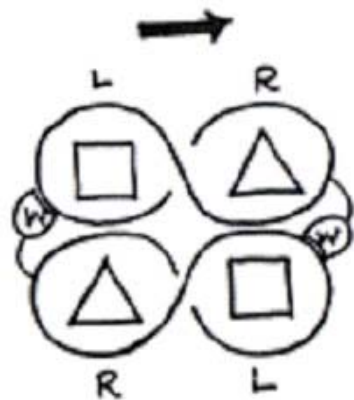

"ANTIPARALLEL"  
MODE

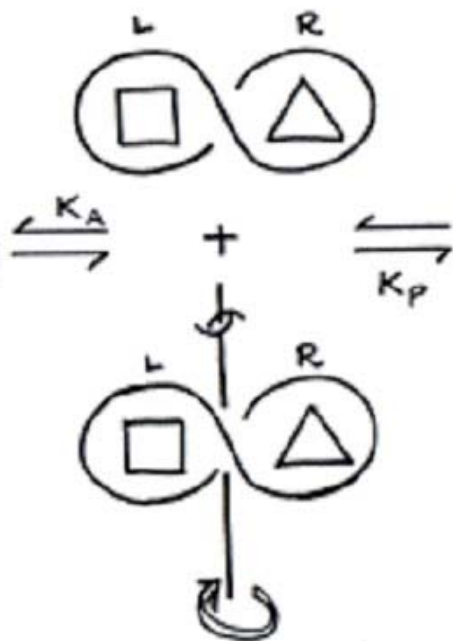

TETRAMER P

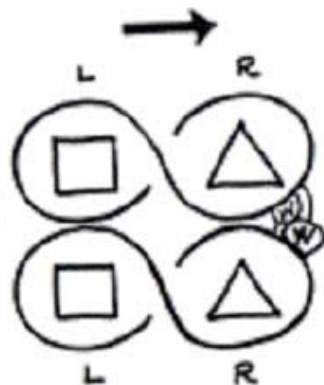

"PARALLEL" MODE

Supplement: pnas_0503112102_9.pdf [file pnas_0503112102_9.pdf]
